# Supplementary material for: Mll-AF4 Confers Enhanced Self-Renewal and Lymphoid Potential during a Restricted Window in Development
Source: PubMed Central journal article supplement (PMC4967476; doi:10.1016/j.celrep.2016.06.046), 2016-07-07
Supplement: mmc1.pdf [file mmc1.pdf]

**Cell Reports, Volume 16**

**Supplemental Information**

**MII-AF4 Confers Enhanced Self-Renewal  
and Lymphoid Potential  
during a Restricted Window in Development**

**Neil A. Barrett, Camille Malouf, Chrysa Kapeni, Wendi A. Bacon, George  
Giotopoulos, Sten Eirik W. Jacobsen, Brian J. Huntly, and Katrin Ottersbach**

## Supplemental Figures:

**Figure S1: Mll-AF4 does not cause major changes to embryonic hematopoiesis. Related to Figure 2.**

The proportion of distinct hematopoietic cell populations was determined in embryonic tissues of indicated genotypes by flow cytometry. (A) HSPCs in the E11 YS, n=3-10; (B) HSPCs, n=3-6, and (C) B cells in the E11 AGM, n=3-4; (D) HSPCs, n=3-10; (E) B cells, n=3-10 and (F) LMPPs (Lin<sup>-</sup> B220<sup>-</sup> CD19<sup>-</sup> ckit<sup>+</sup> CD45<sup>+</sup> Sca1<sup>+</sup> Flt3<sup>+</sup>) in the E12 FL, n=2-7; (G) ESLAM (EPCR<sup>+</sup> CD45<sup>+</sup> CD150<sup>+</sup> CD48<sup>-</sup>), n=5-8; (H) B cells, n=3-9, and (I) LMPPs in the E14 FL, n=3-7. Error bars = SEM. Statistical analysis was performed using the non-parametric Kruskal-Wallis test with Dunn's multiple comparisons, but no significant differences were found.

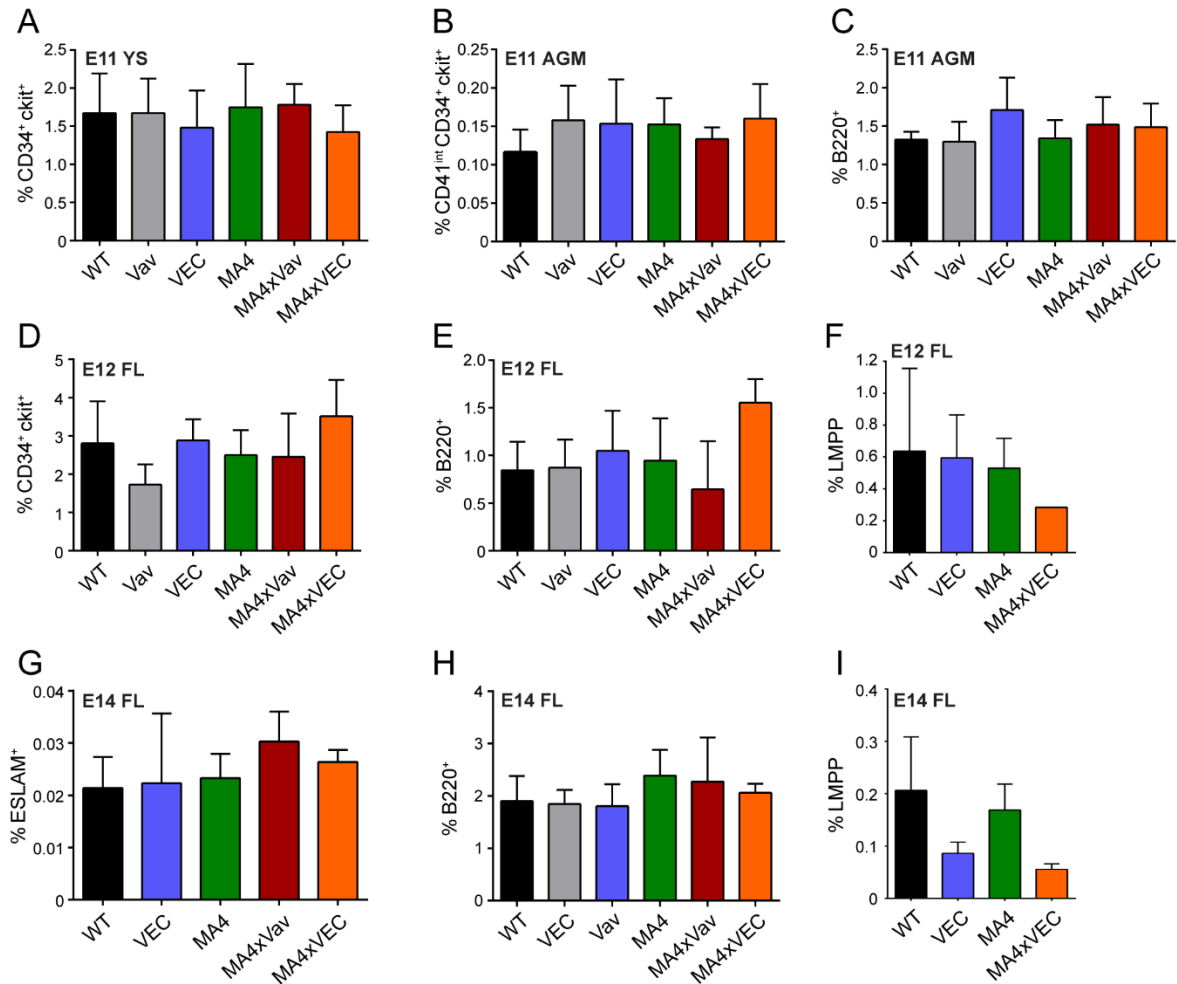

**Figure S2: Mll-AF4 recruits SEC and DOT1L. Related to Figure 4.**

Effect of inhibitors of BET proteins (IBET) and DOT1L (SGC, EPZ) at indicated concentrations ( $\mu\text{M}$ ) on B lymphoid colony formation from (A) E14 FL Mll-AF4-expressing cells, n=3-4; (B) E14 FL Cre-only control cells, n=2; (C) adult BM (~1 year old, pre-morbid) Mll-AF4-expressing cells, n=2; (D) adult BM (~1 year old, pre-morbid) Cre-only control cells, n=2. Error bars = SEM. Statistical analysis was performed using a parametric one-way ANOVA with Tukey's multiple comparisons test. \*\*\*\* $p < 0.0001$ , \*\*\* $p < 0.001$ , \*\* $p < 0.01$ .

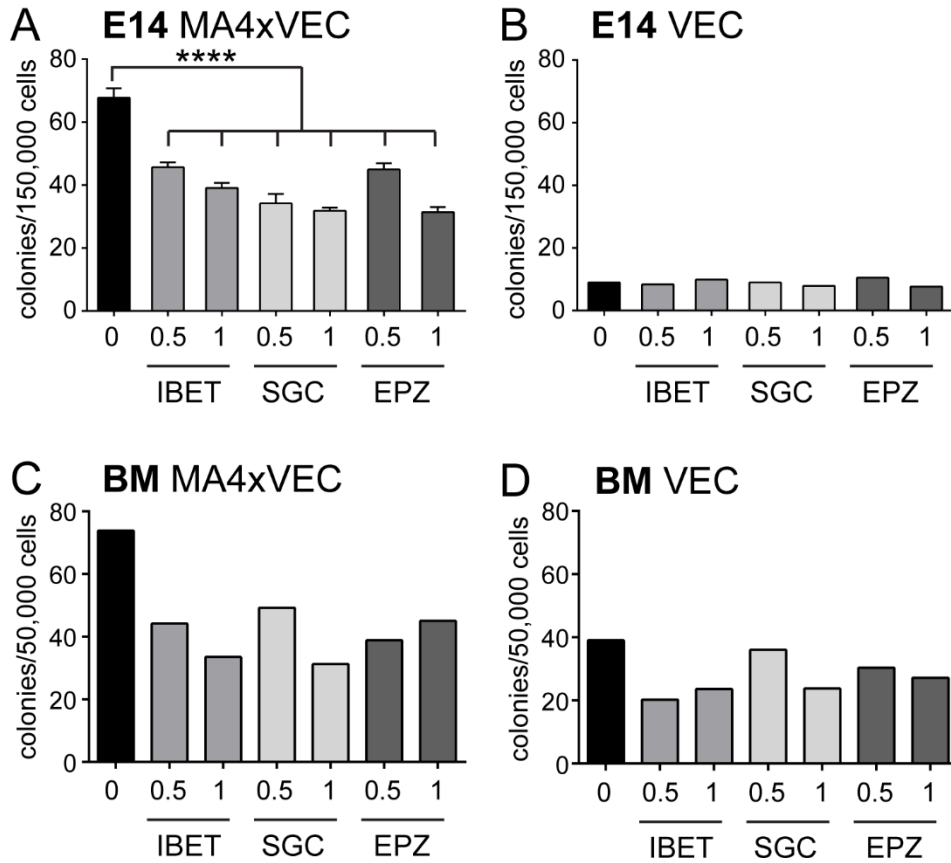

**Supplemental Table S1: Disease development in transplant recipients. Related to Figure 5.**

|           | MA4xVEC           |                   |                      |                                                                                                                       | VEC               |                      |                                                                              |
|-----------|-------------------|-------------------|----------------------|-----------------------------------------------------------------------------------------------------------------------|-------------------|----------------------|------------------------------------------------------------------------------|
|           | No.sick/<br>total | latency<br>(days) | % donor<br>chimerism | phenotype                                                                                                             | No.<br>sick/total | % donor<br>chimerism | phenotype                                                                    |
| Primary   |                   |                   |                      |                                                                                                                       |                   |                      |                                                                              |
| E12 Plac  | 1/6               | 186               | 0                    | no donor cells<br>expansion of recipient T<br>cells                                                                   | 0/6               |                      |                                                                              |
| E12 FL    | 5/7               | 293-405           | 95-100               | splenomegaly<br>hepatomegaly<br>mesenteric tumor<br>mediastinal disease<br>reduced B cells<br>increased myeloid cells | 0/5               |                      |                                                                              |
| E14 FL    | 1/14              | 345               | 95-100               | slight splenomegaly<br>reduced B cells<br>increased myeloid cells<br>increased T cells<br>increased ckit+ cells       | 1/10              | 6                    | expansion of<br>recipient<br>myeloid cells                                   |
|           | 2/14              | 150-186           | 0-10                 | slight hepatomegaly<br>expansion of recipient T<br>cells                                                              |                   |                      |                                                                              |
| Secondary |                   |                   |                      |                                                                                                                       |                   |                      |                                                                              |
| E14 FL    | 1/10              | 280               | 95-100               | splenomegaly<br>increased myeloid cells<br>increased T cells                                                          | 1/11              | 0                    | splenomegaly<br>slight<br>hepatomegaly<br>reduced<br>recipient<br>leukocytes |
